# Supplementary material for: Fluorescent coordination-polymer single crystals with tunable elastic–plastic transformations
Source: Royal Society of Chemistry journal article supplement (doi:10.1039/d5dt02338f), 2025-11-18
Supplement: d5dt02338f5.pdf [file d5dt02338f5.pdf]

*Supporting Information*

**Fluorescent Coordination-Polymer Single Crystals with  
Tunable Elastic-Plastic Transformations**

*Jia-Hui Zhang<sup>a</sup>, Yu-Xia Li<sup>a</sup>, Kai-Ge Gao<sup>b</sup>, Xin-Li Shi<sup>a</sup>, Jie-Sheng Hu<sup>a</sup>, Hui Ai<sup>c</sup>, Zi-Shuo Yao<sup>a\*</sup> and Jun Tao<sup>a</sup>*

<sup>a</sup> Key Laboratory of Cluster Science of Ministry of Education, School of Chemistry and Chemical Engineering, Beijing Institute of Technology, Beijing 102488, China

<sup>b</sup> College of Physical Science and Technology, Yangzhou University, Yangzhou, Jiangsu 225009, China.

<sup>c</sup> Analysis & Testing Center, Office of National Assets & Laboratory Management, Liangxiang Campus, Beijing Institute of Technology, Beijing 102488, China

E-mail: taojun@bit.edu.cn; zishuoyao@bit.edu.cn

## Experimental section

### Crystal Synthesis:

[Cd<sub>2</sub>Cl<sub>4</sub>(Im)<sub>2</sub>]<sub>n</sub> (**1**): CdCl<sub>2</sub> (1.5 mmol), Imidazole (3mmol) and 10 mL Distilled water were added in a 20 mL Teflon-sealed autoclave. The mixture was stirred for approximately 24 hours and then filtered to obtain a clear solution. Needle-like crystals of compound **1** after the system was gradually cooled to room temperature, formed the high-quality needle-shaped single crystals. The yield was ca.61.26%. Anal. C<sub>3</sub>H<sub>4</sub>CdCl<sub>2</sub>N<sub>2</sub> (251.37); calcd C 14.33%, H 1.60%, N 11.41%; found C 14.47%, H1.76%, N 11.00%.

[Cd<sub>2</sub>Cl<sub>4</sub>(MeIm)<sub>2</sub>]<sub>n</sub> (**2**): CdCl<sub>2</sub> (1.5 mmol), 1-methylimidazole (3mmol) and 10 mL Distilled water were added in a 20 mL Teflon-sealed autoclave. The mixture was stirred for approximately 24 hours and then filtered to obtain a clear solution. Needle-like crystals of compound **2** after the system was gradually cooled to room temperature, formed the high-quality needle-shaped single crystals. The yield was ca.56.46%. Anal. C<sub>4</sub>H<sub>6</sub>CdCl<sub>2</sub>N<sub>2</sub> (265.40); calcd C 18.10%, H 2.28%, N 10.55%; found C 18.09%, H 2.03%, N 10.50%.

[Cd<sub>2</sub>Cl<sub>4</sub>(EtIm)<sub>2</sub>]<sub>n</sub> (**3**): CdCl<sub>2</sub> (1.5 mmol), 1-ethylimidazole (3mmol) and 10 mL Distilled water were added in a 20 mL Teflon-sealed autoclave. The mixture was stirred for approximately 24 hours and then filtered to obtain a clear solution. Needle-like crystals of compound **3** after the system was gradually cooled to room temperature, formed the high-quality needle-shaped single crystals. The yield was ca.47.73%. Anal.

$\text{C}_5\text{H}_8\text{CdCl}_2\text{N}_2$  (279.43); calcd C 21.49%, H 2.88%, N 10.02%; found C 21.21%, H 2.68%, N 9.88%.

**Single-crystal X-ray diffraction (SC-XRD):** The single-crystal X-ray diffraction data were collected using a Rigaku Oxford XtaLAB PRO diffractometer equipped with a Mo-K $\alpha$  radiation source. The diffraction data were collected at 298 K. The structures at different phases were solved using direct methods and refined by full matrix least-squares techniques on F<sup>2</sup> with the SHELX program implemented in the Olex2 program.

**Photoluminescence (PL) spectra:** The data were obtained with an FLS1000 fluorescence spectrophotometer (Edinburgh Instruments) featuring a continuous xenon lamp and visible/NIR photomultiplier tube (PMT) detectors (Hamamatsu P9289P and R5509).

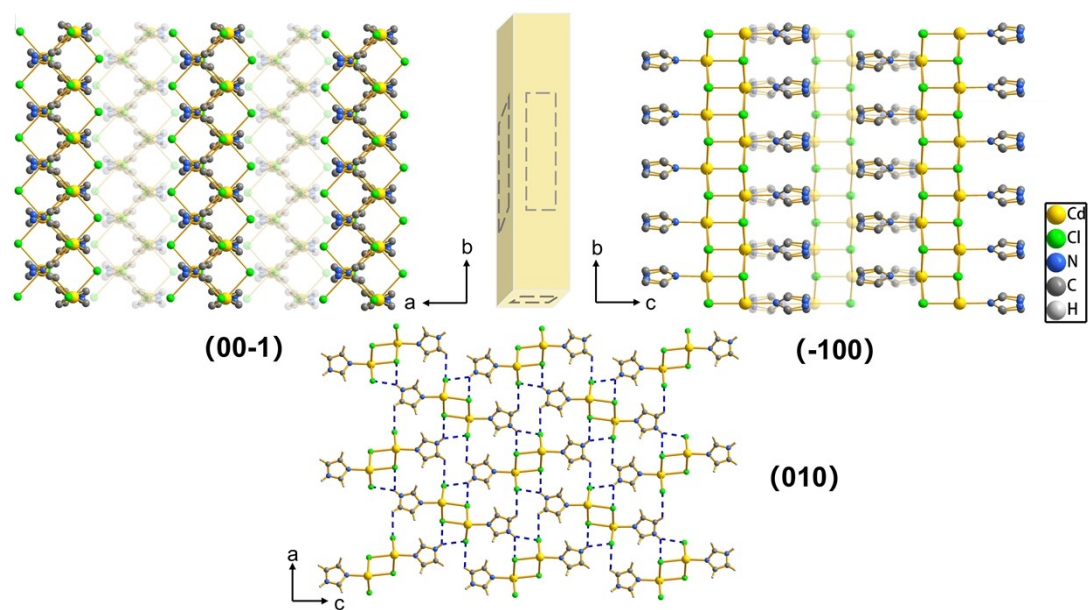

**Figure S1.** Stacking structure of compound 1.

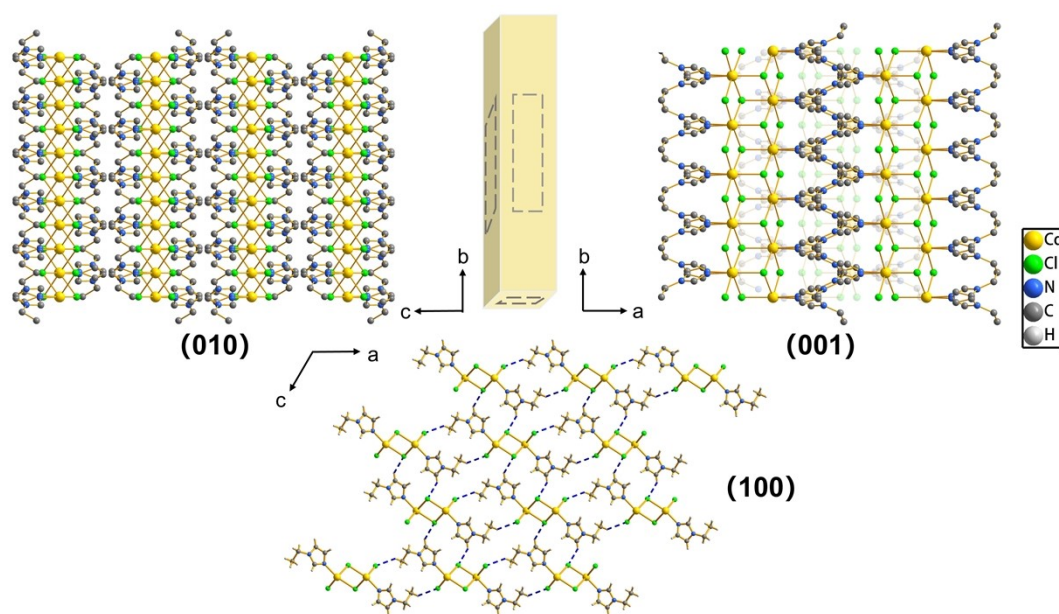

**Figure S2.** Stacking structure of compound 3.

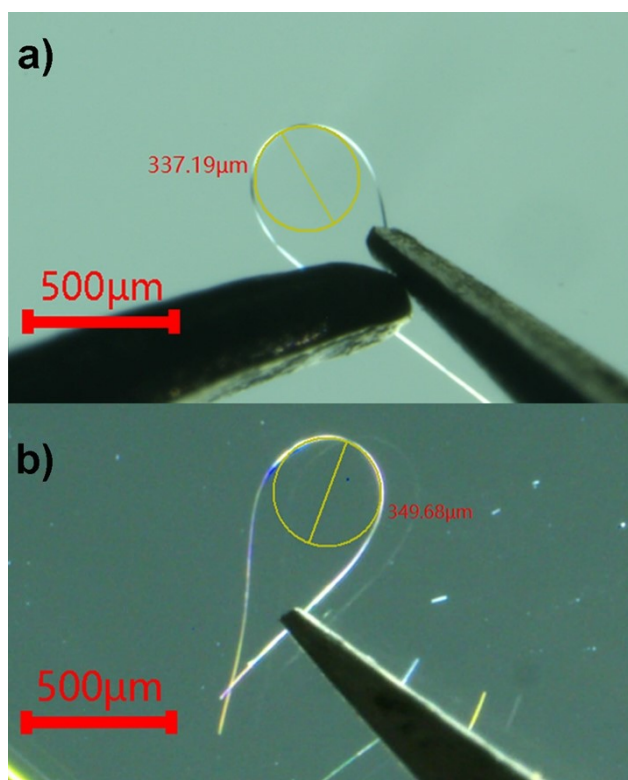

**Figure S3.** Measurement of the maximum bending strain. a) crystal 1. b) crystal 2.

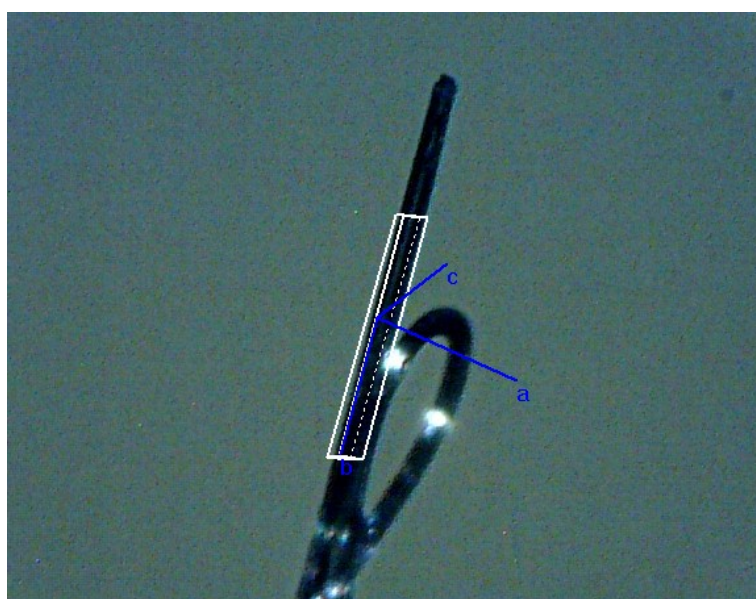

**Figure S4.** Crystal morphology with the face indices of compound 1.

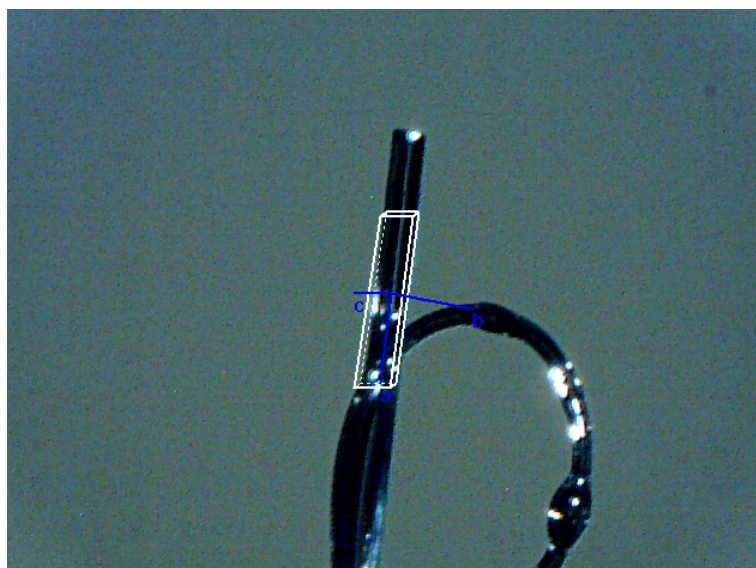

**Figure S5.** Crystal morphology with the face indices of compound **2**.

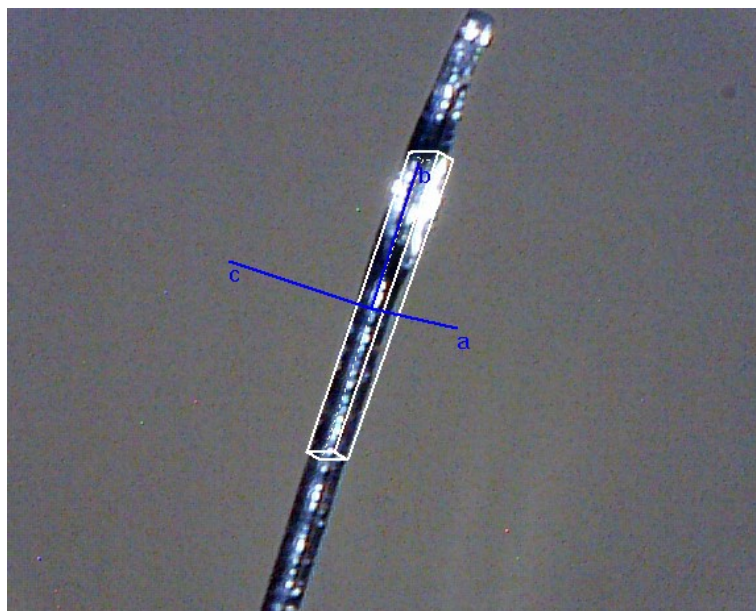

**Figure S6.** Crystal morphology with the face indices of compound **3**.

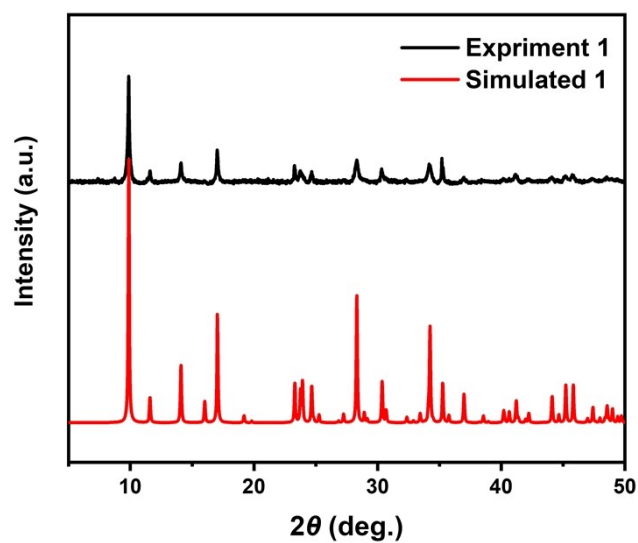

**Figure S7.** Experimental and simulated PXRD patterns of compound **1** at room temperature.

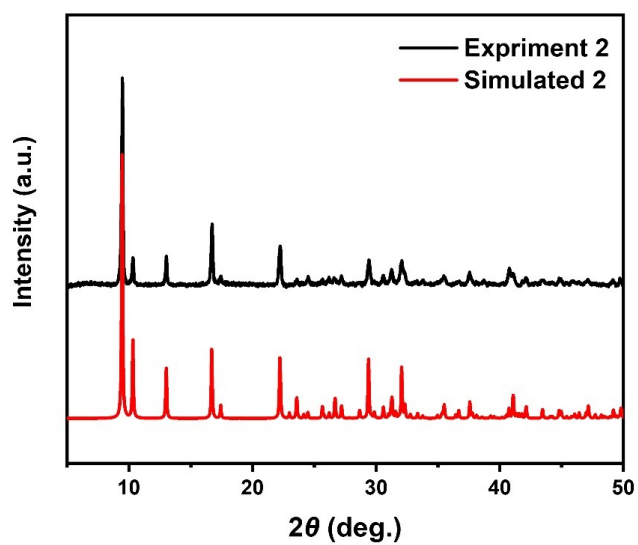

**Figure S8.** Experimental and simulated PXRD patterns of compound **2** at room temperature.



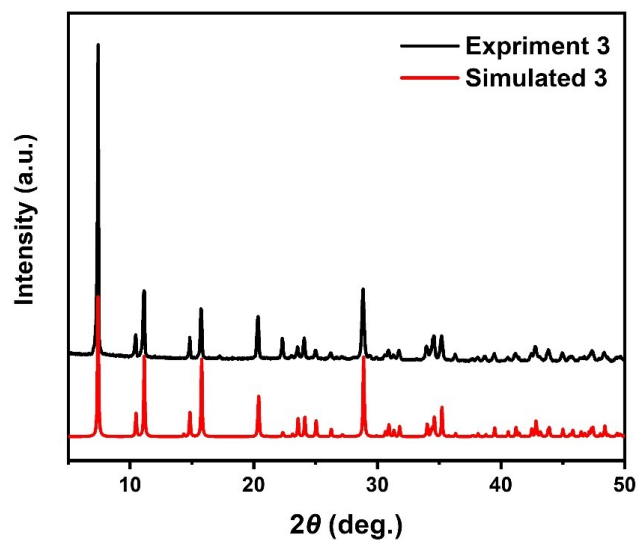

**Figure S9.** Experimental and simulated PXRD patterns of compound **3** at room temperature.



**Table S1.** Types and distances of weak intermolecular interactions between 1D chains.

| Style                | 1      | 2     | 3     |
|----------------------|--------|-------|-------|
| <b>d</b> C-H...Cl(Å) | 2.887  | 2.897 | 2.919 |
|                      | 2.994  | 3.047 | 2.989 |
|                      | 3.044  | 3.082 | 3.111 |
| <b>d</b> N-H...Cl(Å) | 2.5502 | 3.163 |       |
|                      | 2.8867 |       |       |

**Table S2.** Cd...Cd distance along the direction of the one-dimensional chain.

| Samples  | Distance (Cd...Cd)/ Å |
|----------|-----------------------|
| <b>1</b> | 3.8319                |
| <b>2</b> | 3.8859                |
| <b>3</b> | 3.9649                |

**Table S3.** Changes in the framework angle.

| Samples  | $\angle \text{Cl}_1\text{CdCl}_1/^\circ$ | $\angle \text{Cl}_2\text{CdCl}_2/^\circ$ | $\angle \text{CdCl}_1\text{Cd}/^\circ$ | $\angle \text{CdCl}_2\text{Cd}/^\circ$ |
|----------|------------------------------------------|------------------------------------------|----------------------------------------|----------------------------------------|
| <b>1</b> | 87.36                                    |                                          | 95.08                                  | 89.68                                  |
| <b>2</b> | 86.17                                    | 86.73                                    | 96.60                                  | 90.30                                  |
| <b>3</b> | 85.47                                    |                                          | 97.72                                  | 91.16                                  |

**Table S4.** Crystal data and structure refinement for compound **1-3**.

| Identification code                  | 1                                                              | 2                                                              | 3                                                              |
|--------------------------------------|----------------------------------------------------------------|----------------------------------------------------------------|----------------------------------------------------------------|
| Empirical formula                    | C <sub>3</sub> H <sub>4</sub> CdCl <sub>2</sub> N <sub>2</sub> | C <sub>4</sub> H <sub>6</sub> CdCl <sub>2</sub> N <sub>2</sub> | C <sub>5</sub> H <sub>8</sub> CdCl <sub>2</sub> N <sub>2</sub> |
| Formula weight                       | 251.37                                                         | 265.40                                                         | 279.43                                                         |
| Temperature/K                        | 293(2)                                                         | 293(2)                                                         | 293(2)                                                         |
| Crystal system                       | orthorhombic                                                   | monoclinic                                                     | monoclinic                                                     |
| Space group                          | <i>Pnma</i>                                                    | <i>P2<sub>1</sub>/c</i>                                        | <i>I2/m</i>                                                    |
| a/Å                                  | 11.0566(10)                                                    | 3.8859(4)                                                      | 13.164(3)                                                      |
| b/Å                                  | 3.8319(3)                                                      | 17.1403(15)                                                    | 3.9649(6)                                                      |
| c/Å                                  | 15.2570(10)                                                    | 11.2169(9)                                                     | 16.918(3)                                                      |
| α/°                                  | 90                                                             | 90                                                             | 90                                                             |
| β/°                                  | 90                                                             | 95.796(8)                                                      | 110.14(2)                                                      |
| γ/°                                  | 90                                                             | 90                                                             | 90                                                             |
| Volume/Å <sup>3</sup>                | 646.41(9)                                                      | 743.29(12)                                                     | 829.0(3)                                                       |
| Z                                    | 1.333333                                                       | 4                                                              | 4                                                              |
| ρ <sub>calc</sub> .g/cm <sup>3</sup> | 2.583                                                          | 2.372                                                          | 2.239                                                          |
| μ/mm <sup>-1</sup>                   | 4.092                                                          | 3.565                                                          | 3.203                                                          |
| F(000)                               | 472.0                                                          | 504.0                                                          | 536.0                                                          |
| Radiation                            | Mo Kα (λ = 0.71073)                                            | Mo Kα (λ = 0.71073)                                            | Mo Kα (λ = 0.71073)                                            |
| 2Θ range /°                          | 7.84 to 58.218                                                 | 7.68 to 59.394                                                 | 7.254 to 58.38                                                 |
| Index ranges                         | -11 ≤ h ≤ 15, -4 ≤ k ≤ 4, -18 ≤ l ≤ 20                         | -5 ≤ h ≤ 5, -23 ≤ k ≤ 23, -15 ≤ l ≤ 15                         | -17 ≤ h ≤ 16, -4 ≤ k ≤ 5, -20 ≤ l ≤ 23                         |
| Reflections collected                | 3651                                                           | 7873                                                           | 3382                                                           |
| Independent reflections              | 870 [R <sub>int</sub> = 0.0335, R <sub>sigma</sub> = 0.0291]   | 870 [R <sub>int</sub> = 0.0335, R <sub>sigma</sub> = 0.0291]   | 1090 [R <sub>int</sub> = 0.1408, R <sub>sigma</sub> = 0.1230]  |
| Data/restraints/parameters           | 870/9/64                                                       | 1860/0/83                                                      | 1090/42/83                                                     |
| Goodness-of-fit on F <sup>2</sup>    | 1.255                                                          | 0.990                                                          | 0.952                                                          |
| Final R indexes [I ≥ 2σ (I)]         | R <sub>1</sub> = 0.0285, wR <sub>2</sub> = 0.0704              | R <sub>1</sub> = 0.0323, wR <sub>2</sub> = 0.0645              | R <sub>1</sub> = 0.0532, wR <sub>2</sub> = 0.1064              |
| Final R indexes [all data]           | R <sub>1</sub> = 0.0340, wR <sub>2</sub> = 0.0720              | R <sub>1</sub> = 0.0500, wR <sub>2</sub> = 0.0732              | R <sub>1</sub> = 0.0671, wR <sub>2</sub> = 0.1122              |

|                                                |            |            |            |
|------------------------------------------------|------------|------------|------------|
| Largest diff. peak/hole / e<br>Å <sup>-3</sup> | 0.72/-0.61 | 1.13/-1.16 | 1.12/-1.31 |
| CCDC                                           | 2486224    | 2486226    | 2486225    |

**Table S5.** Summary and comparison of reported work on 1D CPs.

| Compounds                                                                       | Distance (Cd⋯Cd)/ Å | ε (%) |
|---------------------------------------------------------------------------------|---------------------|-------|
| [CdCl <sub>2</sub> (3-Clpy) <sub>2</sub> ] <sub>n</sub>                         | 3.812               | 0.71  |
| [CdCl <sub>2</sub> (3-Brpy) <sub>2</sub> ] <sub>n</sub>                         | 3.854               | 0.47  |
| [CdBr <sub>2</sub> (3-Brpy) <sub>2</sub> ] <sub>n</sub> <sup>1</sup>            | No found            | 0.59  |
| [CdCl <sub>2</sub> (I-pz) <sub>2</sub> ] <sub>n</sub>                           | 3.9399              | 0.573 |
| [CdBr <sub>2</sub> (I-pz) <sub>2</sub> ] <sub>n</sub>                           | 4.0317              | 0.505 |
| [CdI <sub>2</sub> (I-pz) <sub>2</sub> ] <sub>n</sub>                            | 4.2080              | 0.473 |
| [CdCl <sub>2</sub> (Br-pz) <sub>2</sub> ] <sub>n</sub>                          | 3.846               | 0.757 |
| [CdBr <sub>2</sub> (Br-pz) <sub>2</sub> ] <sub>n</sub>                          | 3.9125              | 1.162 |
| [CdCl <sub>2</sub> (Cl-pz) <sub>2</sub> ] <sub>n</sub>                          | 3.7369              | 1.134 |
| [CdBr <sub>2</sub> (Cl-pz) <sub>2</sub> ] <sub>n</sub> <sup>2</sup>             | 3.8547              | 1.244 |
| [CdI <sub>2</sub> (3-CNpy) <sub>2</sub> ] <sub>n</sub>                          | No found            | 1.09  |
| [CdCl <sub>2</sub> (3-CNpy) <sub>2</sub> ] <sub>n</sub>                         | 3.795               | 1.09  |
| [CdCl <sub>2</sub> (4-CNpy) <sub>2</sub> ] <sub>n</sub> <sup>3</sup>            | 3.781               | 1.07  |
| [Pb(SCN) <sub>2</sub> (3F-spy) <sub>2</sub> ] <sub>n</sub> <sup>4</sup>         | 4.175               | 1.3   |
| [Pb(SCN) <sub>2</sub> (2F-spy) <sub>2</sub> ] <sub>n</sub> <sup>5</sup>         | No found            | 0.8   |
| [CdCl <sub>2</sub> (3-Ipy) <sub>2</sub> ] <sub>n</sub>                          | 3.95                | 0.28  |
| [CdI <sub>2</sub> (3-Ipy) <sub>2</sub> ] <sub>n</sub> <sup>6</sup>              | No found            | 0.4   |
| [CdCl <sub>2</sub> (1-Methyl-2-pyridone)] <sub>n</sub> <sup>7</sup>             | 3.840               | 2.24  |
| [Pb <sub>2</sub> Br <sub>4</sub> (DMA) <sub>2</sub> ] <sub>n</sub>              | 4.379               | 1.36  |
| [Pb <sub>2</sub> Br <sub>4</sub> (DMF) <sub>2</sub> ] <sub>n</sub> <sup>8</sup> | 4.343               | 0.34  |
| Crystal of this work <b>1</b>                                                   | 3.8319              | 4.98  |
| Crystal of this work <b>2</b>                                                   | 3.8859              | 4.45  |

py = pyridine; pz = pyrazine; spy = 3-fluoro-4'-styrylpyridine; DMF = *N*, *N*-dimethylformamide; DMA = *N*, *N*-dimethylacetamide

## Reference

- 1 M. Pisačić, I. Kodrin, I. Biljan and M. Đaković, *CrystEngComm*, 2021, **23**, 7072–7080.
- 2 M. Đaković, M. Borovina, M. Pisačić, C. B. Aakeröy, Ž. Soldin, B. M. Kukovec and I. Kodrin, *Angew. Chem. Int. Ed.*, 2018, **57**, 14801–14805.
- 3 M. Pisačić, I. Kodrin, A. Trninić and M. Đaković, *Chem. Mater.*, 2022, **34**, 2439–2448.
- 4 B. B. Rath and J. J. Vittal, *Chem. Mater.*, 2021, **33**, 4621–4627.
- 5 B. B. Rath, M. Gupta and J. J. Vittal, *Chem. Mater.*, 2021, **34**, 178–185.
- 6 M. Pisačić, I. Biljan, I. Kodrin, N. Popov, Ž. Soldin and M. Đaković, *Chem. Mater.*, 2021, **33**, 3660–3668.
- 7 Y. Zhang, Y.-X. Li, K.-G. Gao, J.-H. Zhang, J.-S. Hu, J. Tao and Z.-S. Yao, *Dalton Trans.*, 2024, **53**, 8905–8909.
- 8 T. Ji, F. Yan, Y. Zhang, Q. Lu and K. Gao, *J. Phys. Chem. Lett.*, 2025, **16**, 4236 – 4242.
